# Supplementary material for: The Milk Protein Alpha-Casein Suppresses Triple Negative Breast Cancer Stem Cell Activity Via STAT and HIF-1alpha Signalling Pathways in Breast Cancer Cells and Fibroblasts
Source: Springer Nature journal article supplement (doi:10.1007/s10911-019-09435-1), 2019-09-01
Supplement: MOESM2 [file 17176530]

MDA-MB-231

BJ1 Fibroblasts

A

Reporter: STAT3  
Inhibitor: STAT3

B

Reporter: STAT1 GAS  
Inhibitor: STAT1

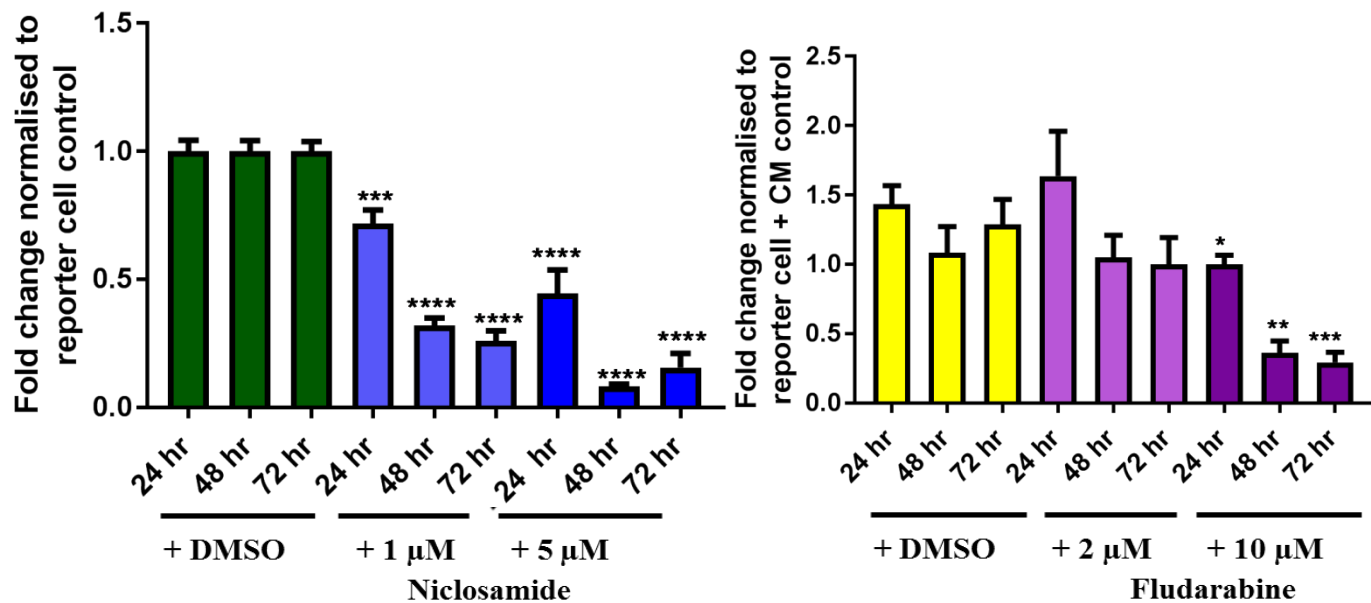

Supplementary Fig.2
