# Supplementary figures and images for: The Milk Protein Alpha-Casein Suppresses Triple Negative Breast Cancer Stem Cell Activity Via STAT and HIF-1alpha Signalling Pathways in Breast Cancer Cells and Fibroblasts
Source: Springer Nature journal article supplement (doi:10.1007/s10911-019-09435-1), 2019-09-01

**A**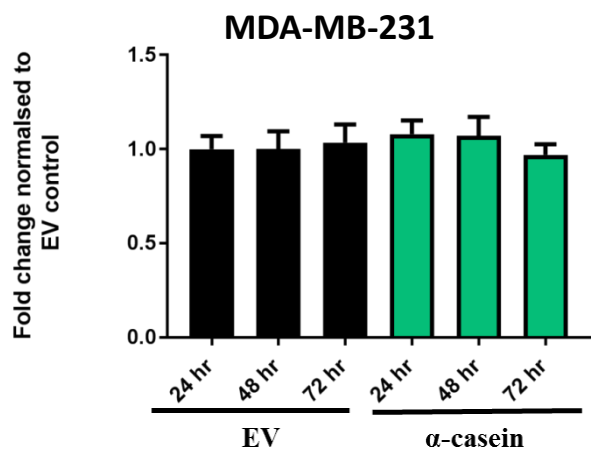**C**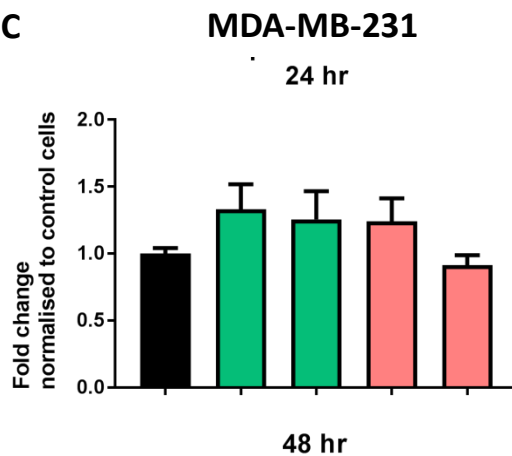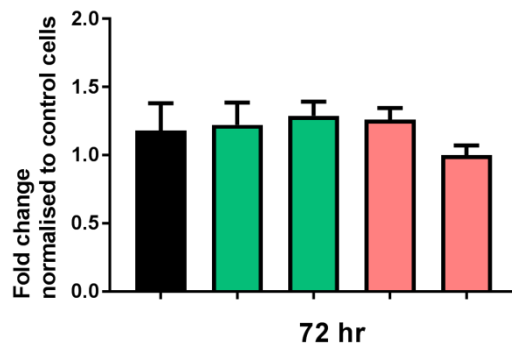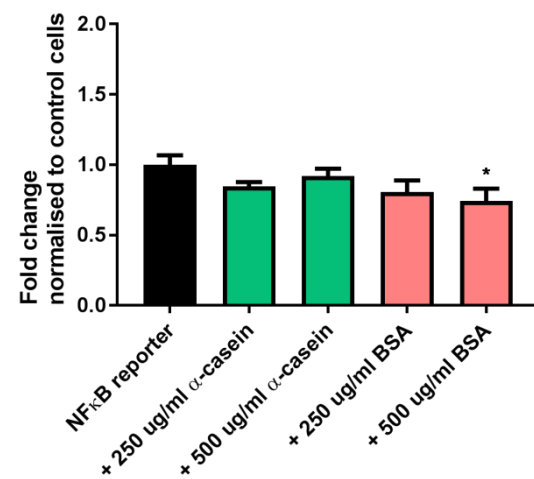**D**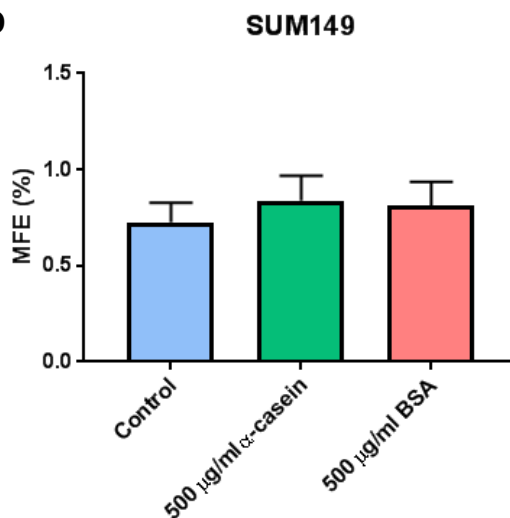**B**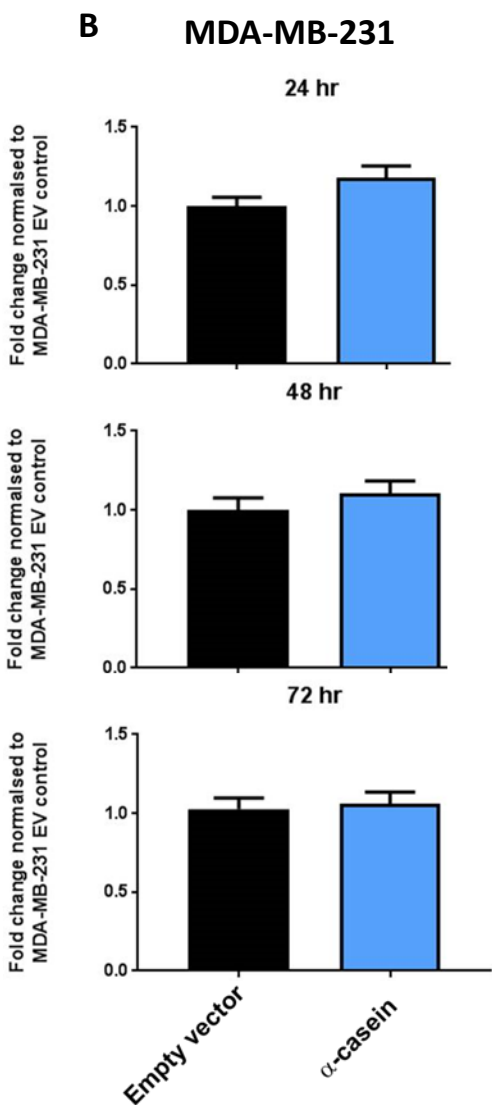

Supplementary Fig.1

Supplement: MOESM1 [file 17176530]

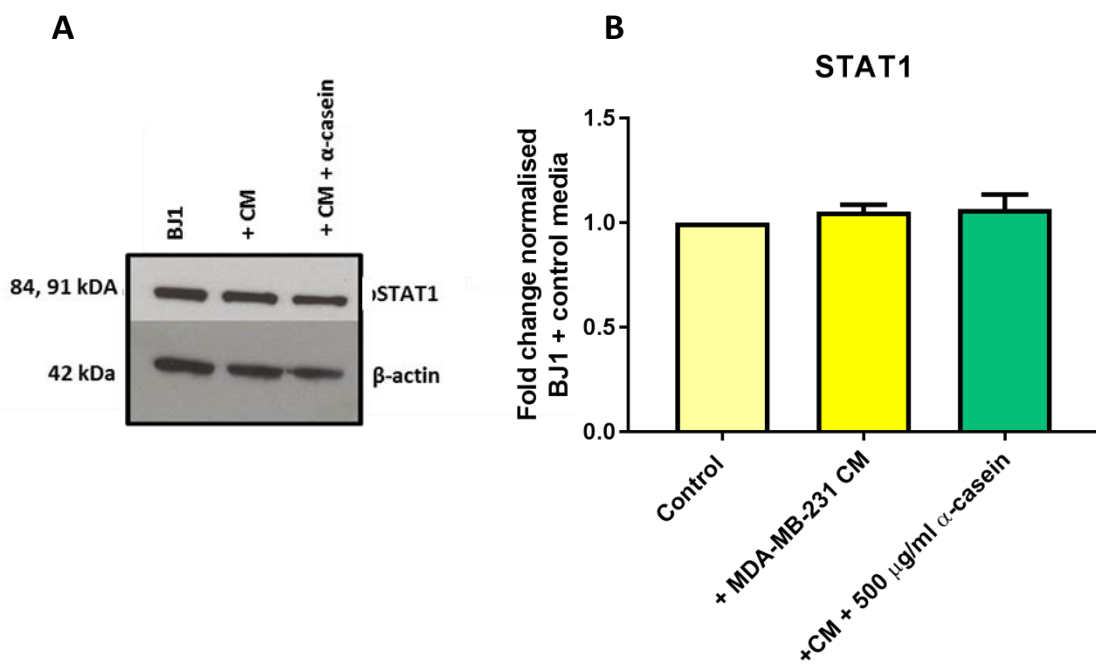

Supplementary Fig.3

Supplement: MOESM3 [file 17176530]

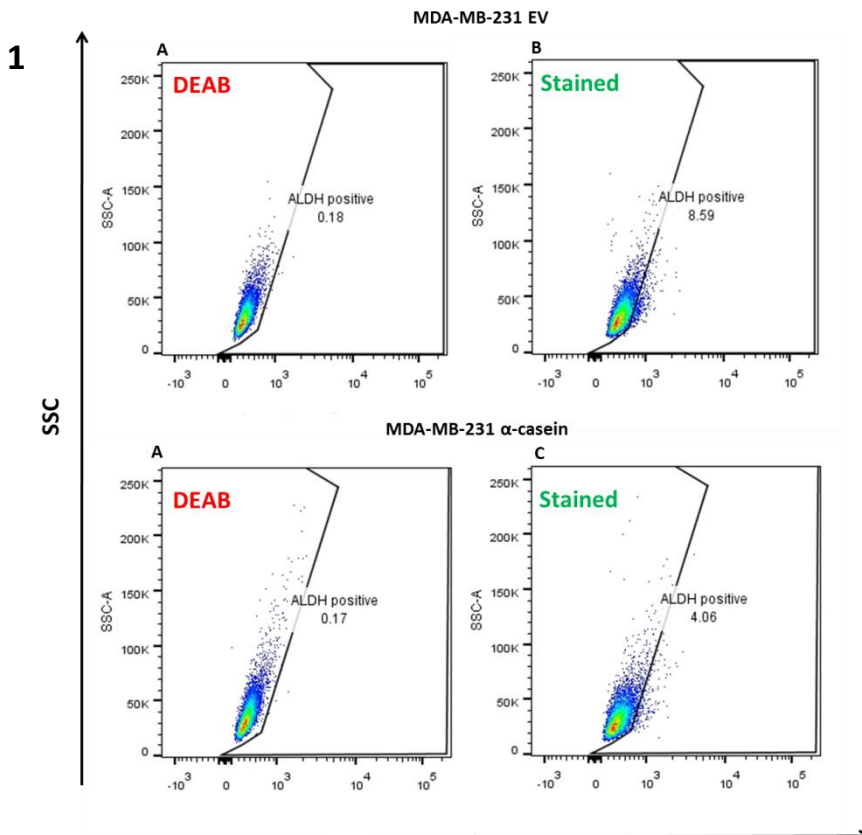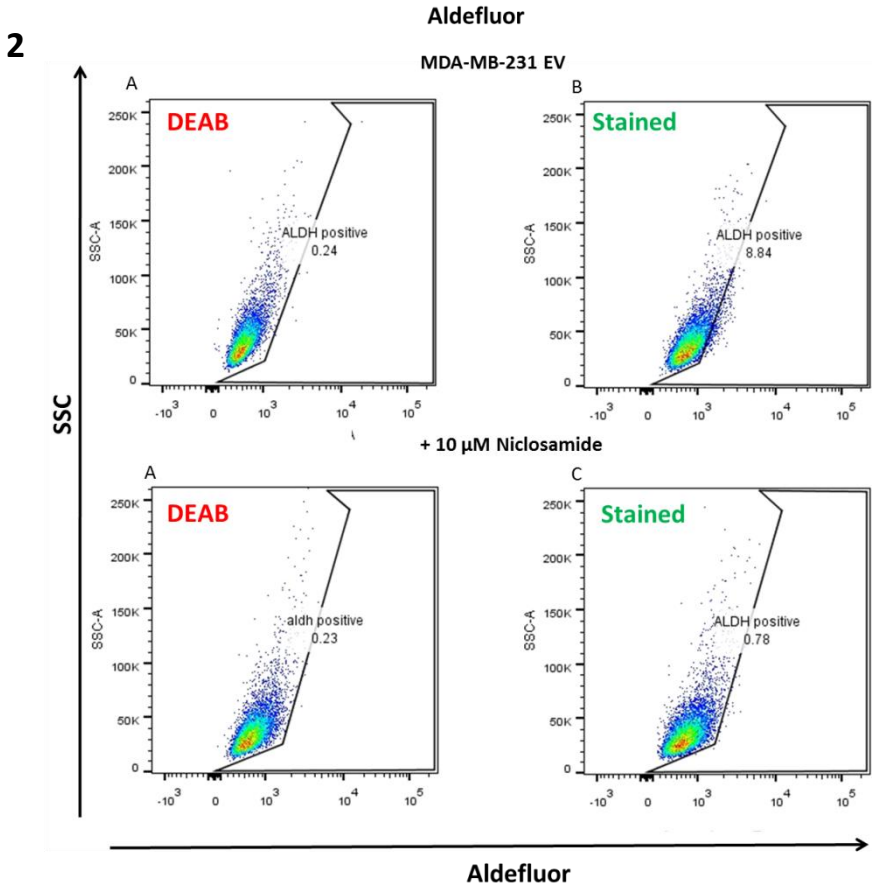

Supplementary Fig.4

Supplement: MOESM4 [file 17176530]
